# Supplementary material for: Comparison of intra- and inter-host genetic diversity in rabies virus during experimental cross-species transmission
Source: PubMed Central journal article supplement (PMC6615636; doi:10.1371/journal.ppat.1007799), 2019-06-20

**Figure S2. Average number of total SNVs distributed throughout RABV genome.**

SNVs are plotted as the percentage per nucleotide per region (N, P, M, G and L genes and the non-coding (NC) regions) and are representative of the average number of mutations per region and per animal for *in vivo* passages (in black) or per cell culture for *in vitro* passages (in grey). Error bars correspond to standard deviations.

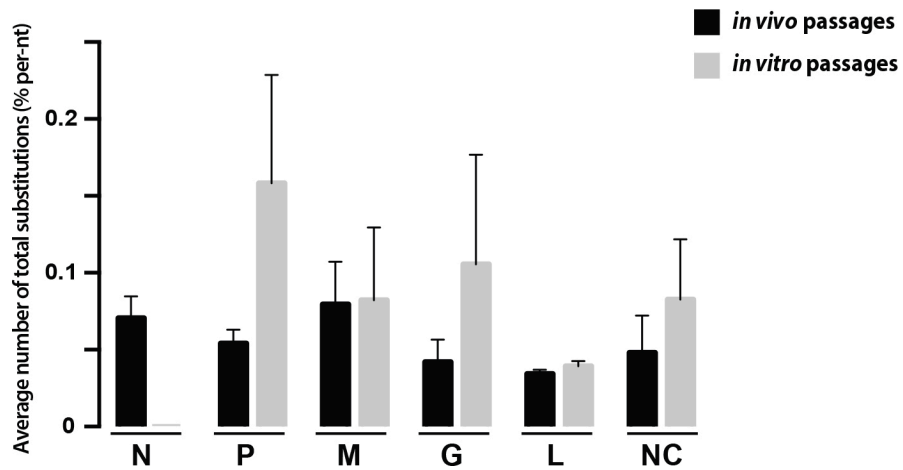

Supplement: ppat.1007799.s002.pdf [file ppat.1007799.s002.pdf]
