# Supplementary material for: Comparison of intra- and inter-host genetic diversity in rabies virus during experimental cross-species transmission
Source: PubMed Central journal article supplement (PMC6615636; doi:10.1371/journal.ppat.1007799), 2019-06-20
Supplement: ppat.1007799.s004.pdf [file ppat.1007799.s004.pdf]

**Table S1 : Doses of inoculum (MIC LD50) used to infect the following *in vivo* passage.**  
 Quantification of viral RNA copies (RNA copies / $\mu$ l of cDNA) present in the salivary glands used for PCR amplification and NGS. Numbers of passages (P1 to P4) refer to Figure 1. X: undetectable viral loads. ND: not determined.

| Virus | Host species | Replicate | P0  | P1        | P2        | P3        | P4    |
|-------|--------------|-----------|-----|-----------|-----------|-----------|-------|
| vDog  | Dog          | 1         | 2.6 | 2.2 (5.3) | X (3.7)   |           |       |
|       |              | 2         | 2.6 | 0.4 (5.3) | (4.2)     |           |       |
|       |              | 3         | 2.6 | 0.4 (5.3) | 0.1 (4.5) | (4.8)     |       |
|       |              | 4         | 1.6 | 0.9 (5.7) | (3.1)     |           |       |
|       |              | 5         | 1.6 | 0.9 (5.7) | 1.7 (3.6) | (2.6)     |       |
|       | Fox          | 1         | 3.4 | 2.3 (6.3) | 1.3 (6.2) | (6.1)     |       |
|       |              | 2         | 2.1 | 2.5 (5.8) | 3.3 (4.6) | 1.3 (6.0) | (ND)  |
|       |              | 3         | 2.1 | 2.5 (5.8) | 1.7 (5.7) | 1.4 (5.6) | (6.2) |
| vFox  | Fox          | 1         | 1.6 | 2.7 (7.5) | 2.6 (6.7) | (6.5)     |       |
|       |              | 2         | 1.6 | 2.1 (6.7) | 2.4 (ND)  | (6.5)     |       |
|       |              | 3         | 1.6 | 2.1 (6.7) | 2.6 (7.2) | (7.4)     |       |
|       | Dog          | 1         | 2.5 | 1.8 (5.3) | 0.5 (4.6) | (4.3)     |       |
|       |              | 2         | 2.5 | 1.8 (5.3) | 1.5 (4.6) | (4.0)     |       |
|       |              | 3         | 2.5 | X         |           |           |       |
|       |              | 4         | 1.5 | (5.0)     |           |           |       |
|       |              | 5         | 1.5 | X         |           |           |       |
